# Supplementary material
Source: HighWire-hosted journal article supplement (http://www.annfammed.org/highwire/filestream/737/field_highwire_adjunct_files/0/Howard_Supp_Apps.pdf)
Supplement: Howard_Supp_Apps.pdf [file Howard_Supp_Apps.pdf]

**Supplemental materials for:**

Miller WL, Rubinstein EB, Howard J, Crabtree BF. Shifting implementation science theory to empower primary care practices. *Ann Fam Med*. 2019;17(3):250-256.

## SUPPLEMENTAL APPENDIX 1: Pioneer Practice Characteristics

|                                                  | <b>P1</b>                                                                                                                                                                                                  | <b>P2</b>                                                                                                                                                                                                                                                                                | <b>P3</b>                                                                                                                                                                                             |
|--------------------------------------------------|------------------------------------------------------------------------------------------------------------------------------------------------------------------------------------------------------------|------------------------------------------------------------------------------------------------------------------------------------------------------------------------------------------------------------------------------------------------------------------------------------------|-------------------------------------------------------------------------------------------------------------------------------------------------------------------------------------------------------|
| <b>Location</b>                                  | urban                                                                                                                                                                                                      | urban                                                                                                                                                                                                                                                                                    | small city                                                                                                                                                                                            |
| <b>Ownership</b>                                 | private                                                                                                                                                                                                    | private                                                                                                                                                                                                                                                                                  | private                                                                                                                                                                                               |
| <b># add'l practice sites</b>                    | 5 (total)                                                                                                                                                                                                  | 9 (in state), 25 (national)                                                                                                                                                                                                                                                              | 0                                                                                                                                                                                                     |
| <b>Clinical workforce roles</b>                  | -MD<br>-NP<br>-RN<br>-MA                                                                                                                                                                                   | -MD/DO<br>-RN<br>-LCSW<br>-health coach (trained onsite)                                                                                                                                                                                                                                 | -MD<br>-PA<br>-MA<br>-nutritionist<br>-pre-medical fellow/health coach (formally trained offsite)                                                                                                     |
| <b>Weekly office visits</b>                      | 184                                                                                                                                                                                                        | 112                                                                                                                                                                                                                                                                                      | 92                                                                                                                                                                                                    |
| <b>Annual office visits (2016)</b>               | 9,557                                                                                                                                                                                                      | 5,791                                                                                                                                                                                                                                                                                    | 4,771                                                                                                                                                                                                 |
| <b>Electronic health records (EHR) system</b>    | developed in-house                                                                                                                                                                                         | developed in-house                                                                                                                                                                                                                                                                       | free, web-based                                                                                                                                                                                       |
| <b>Distinct features</b>                         | -virtual care (phone, email, Skype)<br>-visits scheduled in 30-min increments<br>-freedom to see any clinician at any clinical site<br>-clinician-led care coordination<br>-medical record storage service | -health coach-led care coordination and panel management<br>-team-based care with “transitions navigator” to coordinate care offsite<br>-visits scheduled in 30-min increments<br>-onsite behavioral health specialist<br>-free transportation to/from P2 and other medical appointments | -virtual care (phone, email)<br>-visits scheduled in 20-min increments<br>-health coach and nutritionist, plus onsite acupuncturist/herbalist (independent contractor)<br>-members-only web resources |
| <b>Medical neighborhood connections</b>          | limited                                                                                                                                                                                                    | limited                                                                                                                                                                                                                                                                                  | limited                                                                                                                                                                                               |
| <b>Community offerings (open to non-members)</b> | none                                                                                                                                                                                                       | -monthly classes to support physical, social, and emotional health (e.g., painting, walking, advance care planning)<br>-seasonal social activities (e.g., Valentine’s Day Party, July Sock Hop)                                                                                          | -monthly classes on healthy living with community experts<br>-weekly qigong classes<br>-biweekly walking/running classes                                                                              |

**SUPPLEMENTAL APPENDIX 2. Pioneer Practice Business Models (based on the framework proposed by Morris et al. 2005)**

|                                                                                 | <b>P1 (direct care – large scale)</b>                                                                                                                                         | <b>P2 (contract)</b>                                                                                                                                                                           | <b>P3 (direct care – small scale)</b>                                                                            |
|---------------------------------------------------------------------------------|-------------------------------------------------------------------------------------------------------------------------------------------------------------------------------|------------------------------------------------------------------------------------------------------------------------------------------------------------------------------------------------|------------------------------------------------------------------------------------------------------------------|
| <b>Factors related to offering/service: How do we create value?</b>             | -provide “concierge care for the masses,” incl. underserved patients<br>-de-emphasize clinic by offering virtual care<br>-personalize relationship with practice organization | -specialized services and clinical space for geriatric patients and their support system (wider hallways with handrails, etc.)<br>-personal relationship with health coach and ancillary staff | -holistic approach to disease prevention through lifestyle modification<br>-personal relationship with physician |
| <b>Market factors: Whom do we create value for? (target patient population)</b> | -uninsured, underinsured, insured individuals                                                                                                                                 | -Medicare Advantage patients                                                                                                                                                                   | -uninsured, underinsured, insured individuals<br>-individuals interested in alternative approaches to health     |
| <b>Internal capability factors: What is our source of competence?</b>           | -general primary care, with emphasis on behavioral health                                                                                                                     | -clinical expertise in geriatric medicine and clinic space designed for seniors                                                                                                                | -holistic (lifestyle) medicine                                                                                   |
| <b>Economic factors: How do we make money?</b>                                  | -start-up venture capital<br>-individual memberships<br>-employer contracts (all employees become members)<br>-contract with carrier for managed care plan for underserved    | -venture capital<br>-insurer sponsorship/contract                                                                                                                                              | -individual memberships<br>-employer contracts (on-location wellness services)                                   |
| <b>Growth/exit factors: What are our time, scope, and size ambitions?</b>       | -growth by attracting more employer contracts                                                                                                                                 | -growth by attracting more sponsors and building more clinics                                                                                                                                  | -no current plans for growth                                                                                     |

## **SUPPLEMENTAL APPENDIX 3: Practice Models**

### **P1: Larger-Scale Direct Care Hybrid Model**

- *Focus on relationships, access, and care coordination with care organized by and around the clinicians and their professional expertise and craft.*
- *Seeking to serve all members of the community.*
- *Larger-size practices with multiple sites.*
- *Experimental hybrid of conventional direct care model.*

#### *Business model*

##### Revenue sources

- *Venture capital investments for start-up, expansions, and bridge funding*
  - *Challenged when some initial investors withdrew*
- *Monthly membership fee for individuals/families, tiered by age*
  - *This was initial and primary on-going source of revenue*
  - *Direct care core*
- *Monthly fee for 24/7 virtual urgent care*
  - *A means to attract additional patients into practice*
  - *Also a way to serve more of the community, part of their vision*
- *Subscription plan for employers where employer pays monthly membership fee for all employees*
  - *Additional way to serve more of community*
  - *Facilitate expansion to help meet investment payments*
- *Contract with carrier for managed care plan for underserved where carrier pays agreed upon monthly membership fee (different than others above) for those enrolled.*
  - *Challenged by carrier reduction in fee partly related to high turnover of carrier members*
  - *Another way to serve more of the community*

### **P2: Contract Model**

- *Team-based model, where health coaches are responsible for the majority of patient care in consultation with physicians with goal of maintaining regular contact with high-risk patients.*
- *Small practice size with multiple local sites (as patient panel grows) being scaled nationally. Priority placed on developing responsive team culture.*
- *Clinical teams and care tailored to site-specific contract and population served.*
- *Clinicians freed to emphasize professional expertise and craft.*

#### *Business model*

##### Revenue sources

- *Venture capital investments for start-up, expansions, and bridge funding*
  - *Allowed them to develop and test model*
  - *Early returns are attractive to on-going investment*
- *Contracts with local carriers for Medicare Advantage population (\$ per member per month), which also includes percentage of share in any savings*

This supplemental material was provided by the authors and has not been copy edited by *Annals of Family Medicine*.

- *The shared risk percentage rises as panel size expands*
- *Guaranteed revenue base allows clinical innovation to achieve value*

### **P3: Small-Scale Direct Care Model**

- *Clinician-based model, where physicians/PAs are responsible for the majority of patient care, aided by front office staff and one medical assistant.*
- *Focus on integrative health, including emphasis on lifestyle modification and wellness promotion.*
- *Small practice size, which is linked to capacity and demand.*

#### *Business model*

##### Revenue sources

- Monthly membership fee for individuals/families for menu of guaranteed services
  - *Primary on-going source of revenue & direct care core*
  - *Maintaining continuity is challenge in this economically-challenged area*
- Contracts with employers for on-site wellness clinics at set fee at controlled times
  - *Provides extra income while satisfying professional interests*
- Flat co-pay for visits and extra pay for laboratory services, etc. (at reduced rates)
- Flat co-pay for nutritionist and health coach visits
  - *Both of above help keep monthly membership fees reasonable for local community*
